# Supplementary material
Source: PubMed Central journal article supplement (PMC4096992)
Supplement: NIHMS600460-supplement-01.pdf [file NIHMS600460-supplement-01.pdf]

Table S1. List of T-DDOGs Used in This Study, Related to Figure 1

| T-DDOG                              | DBDG                | ADG <sup>a</sup>        | Used in Figure X   |
|-------------------------------------|---------------------|-------------------------|--------------------|
| <b>Gal4-based T-DDOG</b>            |                     |                         |                    |
| Gal4-GBP6 <sup>VP16-GBP1</sup>      | Gal4DBD-GBP6        | (NLS)-VP16AD-10gly-GBP1 | 2B-2E, S1          |
| Gal4-GBP1 <sup>VP16-GBP6</sup>      | Gal4DBD-GBP1        | (NLS)-VP16AD-GBP6       | 3F                 |
| Gal4-GBP1 <sup>VPminx2-GBP6</sup>   | Gal4DBD-GBP1        | GBP6-10gly-VPminx2      | 3F                 |
| Gal4-GBP1 <sup>VPminx3-GBP6</sup>   | Gal4DBD-GBP1        | GBP6-10gly-VPminx3      | 3F                 |
| Gal4-GBP1 <sup>VPminx4-GBP6</sup>   | Gal4DBD-GBP1        | GBP6-10gly-VPminx4      | 3F                 |
| Gal4-GBP1x2 <sup>VP16-GBP6</sup>    | Gal4DBD-GBP1x2      | (NLS)-VP16AD-GBP6       | 3F                 |
| Gal4-GBP1x2 <sup>VPminx2-GBP6</sup> | Gal4DBD-GBP1x2      | GBP6-10gly-VPminx2      | 3F                 |
| Gal4-GBP1x2 <sup>VPminx3-GBP6</sup> | Gal4DBD-GBP1x2      | GBP6-10gly-VPminx3      | 3F                 |
| Gal4-GBP1x2 <sup>VPminx4-GBP6</sup> | Gal4DBD-GBP1x2      | GBP6-10gly-VPminx4      | 3F                 |
| Gal4-GBP1-B <sup>VP16-GBP6</sup>    | GBP1-10gly-Gal4DBD  | (NLS)-VP16AD-GBP6       | 3F, 3G             |
| Gal4-GBP1 <sup>p65-GBP6</sup>       | GBP1-10gly-Gal4DBD  | (NLS)-p65AD-GBP6        | 3G, 4, 5, 7, S3-S7 |
| Gal4-GBP2 <sup>VP16-GBP7</sup>      | GBP2-10gly-Gal4DBD  | (NLS)-VP16AD-10gly-GBP7 | 2B, 2D, S1         |
| Gal4-GBP2 <sup>p65-GBP7</sup>       | Gal4DBD-GBP2        | (NLS)-GBP7-p65AD        | 6                  |
| Gal4-GBP2-B <sup>VP16-GBP7</sup>    | GBP2-Gal4DBD        | (NLS)-VP16AD-10gly-GBP7 | S3                 |
| Gal4-GBP5 <sup>VPminx2-GBP1</sup>   | GBP5-10gly-Gal4DBD  | GBP1-10gly-VPminx2      | S3                 |
| <b>LexA-based T-DDOG</b>            |                     |                         |                    |
| LexA-GBP1 <sup>VP16-GBP6</sup>      | GBP1-10gly-LexADBBD | (NLS)-VP16AD-GBP6       | 3B                 |
| <b>rTetR-based T-DDOG</b>           |                     |                         |                    |
| rTetR-GBP1 <sup>VP16-GBP6</sup>     | rTetRDBD-GBP1       | (NLS)-VP16AD-GBP6       | 3D, 3E             |

a.) Nuclear localization signal (NLS) added to indicated constructs, but not specified in main text

Table S2. Quantitative Summary of Data Presented in Figure S2, Related to Figure 2

| Condition <sup>a</sup>                              | n <sup>b</sup> | # of GFP+ cells given tdT+ cell counted <sup>c</sup> | % GFP+ cells given tdT+ cells | # of tdT+ cells given GFP cell counted <sup>d</sup> | Average % tdT+ cells given GFP+ cells <sup>e</sup> | SEM <sup>f</sup> | p value (GFP vs. GFPmG 1) <sup>g</sup> |
|-----------------------------------------------------|----------------|------------------------------------------------------|-------------------------------|-----------------------------------------------------|----------------------------------------------------|------------------|----------------------------------------|
| GFP + Gal4-GBP6 <sup>VP16-GBP1</sup> + UAS-tdT      | 6(4)           | 590/592                                              | 99.7                          | 446/600                                             | 74.3                                               | 2.1              | 1.6E-07                                |
| GFPmG1 + Gal4-GBP6 <sup>VP16-GBP1</sup> + UAS-tdT   | 6(4)           | 32/33*                                               | 97                            | 24/600                                              | 4.0                                                | 0.5              |                                        |
| pBScript + Gal4-GBP6 <sup>VP16-GBP1</sup> + UAS-tdT | 4(4)           | 0/10*                                                | 0                             | -                                                   | -                                                  | -                | -                                      |
| GFP + Gal4-GBP2 <sup>VP16-GBP7</sup> + UAS-tdT      | 6(4)           | 570/571                                              | 99.8                          | 432/600                                             | 72.0                                               | 1.0              | 2.2E-02                                |
| GFPmG1 + Gal4-GBP2 <sup>VP16-GBP7</sup> + UAS-tdT   | 7(4)           | 608/609                                              | 99.8                          | 447/700                                             | 63.9                                               | 2.7              |                                        |
| pBScript + Gal4-GBP2 <sup>VP16-GBP7</sup> + UAS-tdT | 5(4)           | 0/11*                                                | 0                             | -                                                   | -                                                  | -                | -                                      |

a) Experiments performed as indicated in Figure S1

b) Sample size indicates number of micrographs taken. Parenthesized number indicates number of independent transfections analyzed.

c) 66-100 cells were counted per micrograph, except in conditions indicated by asterisks, where all the cells within micrographs were counted

d) 100 cells were counted per sample

e) Average of the % tdT+/GFP+ cells values from each sample

f) SEM for average % tdT+/GFP+ cells

g) 2-tailed Student's t-test of values from average % tdT/GFP+ column, assuming unequal variance

Table S3. Quantitative Summary of Results Presented in Figures S4B, S4E, and S4H, Related to Figure 4

| Panel | Promoter for GFP | Condition | n (retinas) | Total n (cells) | % tdT+/ n-βgal+ cells in ONL <sup>a</sup> | SEM |
|-------|------------------|-----------|-------------|-----------------|-------------------------------------------|-----|
| S4B   | CAG              | + CAG-GFP | 3           | 150             | 57.3                                      | 2.9 |
|       | -                | - CAG-GFP | 3           | 151             | 0.7                                       | 0.7 |
| Panel | Promoter for GFP | Condition | n (retinas) | Total n (cells) | % tdT+/GFP+ cells <sup>b</sup>            | SEM |
| S4E   | Rho              | + ADG     | 4           | 201             | 56.7 (ONL) <sup>c</sup>                   | 3.2 |
|       | Rho              | - ADG     | 3           | 150             | 0.7 (ONL)                                 | 0.7 |
| S4H   | mGluR6           | + ADG     | 3           | 122             | 42.8 (INL) <sup>c</sup>                   | 7.6 |
|       | mGluR6           | - ADG     | 3           | 161             | 0.0 (INL)                                 | 0.0 |

a) Value derived from average of parameter measured per retina. At least 50 cells were sampled from each retina in the ONL.

b) Value derived from average of parameter measured per retina. At least 50 and 30 cells were sampled from each retina in the ONL and INL, respectively.

c) Note these data were presented again in Table S6.

Table S4. Quantitative Summary of Results Presented in Figures S4C and S4F, Related to Figure 4

| Panel | Promoter for GFP | Cells counted | n (retinas) | Total n (cells) | % cells in ONL <sup>a</sup> | % cells in INL <sup>a</sup> | SEM |
|-------|------------------|---------------|-------------|-----------------|-----------------------------|-----------------------------|-----|
| S4C   | CAG              | GFP+          | 3           | 795             | 78.0                        | 22.0                        | 0.3 |
|       | CAG              | tdT+          | 3           | 570             | 77.0                        | 23.0                        | 0.1 |
| S4F   | Rho              | GFP+          | 4           | 917             | 98.3                        | 1.7                         | 0.5 |
|       | Rho              | tdT+          | 4           | 517             | 98.7                        | 1.3                         | 0.5 |

a) Value derived from average of parameter measured per retina. All cells within a 20µm thick retina slice (>100 cells) were counted per retina.

Table S5. Quantitative Summary of Results Presented in Figure S4I, Related to Figure 4

| Panel | Promoter for GFP | Cells analyzed | n (cells) | Median normalized fluorescence intensity (a.u.) | Interquartile range |
|-------|------------------|----------------|-----------|-------------------------------------------------|---------------------|
| S4I   | mGluR6           | GFP ONL        | 25        | 4.9                                             | 6.0                 |
|       | mGluR6           | tdT ONL        | 25        | 1.8                                             | 1.9                 |
|       | mGluR6           | GFP INL        | 26        | 35.4                                            | 106.8               |
|       | mGluR6           | tdT INL        | 26        | 89.3                                            | 98.5                |

Table S6. Quantitative Summary of Results Presented in Figures S5A and S5B, Related to Figure 4

| Panel | Promoter for GFP | Layer analyzed | n (retinas) | Total n (cells) | % GFP+/tdT+ cells <sup>a</sup> | SEM |
|-------|------------------|----------------|-------------|-----------------|--------------------------------|-----|
| S5A   | CAG              | ONL            | 3           | 150             | 96.7                           | 0.7 |
|       | CAG              | INL            | 3           | 86              | 95.4                           | 1.0 |
|       | Rho              | ONL            | 4           | 200             | 97.5                           | 1.0 |
|       | mGluR6           | INL            | 3           | 90              | 90.6                           | 3.1 |
| Panel | Promoter for GFP | Layer analyzed | n (retinas) | Total n (cells) | % tdT+/GFP+ cells <sup>a</sup> | SEM |
| S5B   | CAG              | ONL            | 3           | 150             | 66.7                           | 4.1 |
|       | CAG              | INL            | 3           | 90              | 70.0                           | 3.3 |
|       | Rho              | ONL            | 4           | 201             | 56.7 <sup>b</sup>              | 3.2 |
|       | mGluR6           | INL            | 3           | 122             | 42.8 <sup>b</sup>              | 7.6 |

a) Value derived from average of % tdT+/GFP+ cells per retina. At least 50 and 30 cells were sampled from each retina in the ONL and INL, respectively.

b) Note these data were presented again in Table S3.

Table S7. Additional Quantification of Intrinsic Membrane and Action Potential Properties of L2/3 S1 Pyramidal Neurons, Related to Figure 5

| Property         | GFP- (n = 10)     | GFP+/tdT- (n = 8) | GFP+/tdT+ (n = 8) | <i>p</i> value |
|------------------|-------------------|-------------------|-------------------|----------------|
| $\tau_m$ , ms    | 67.15 $\pm$ 4.56  | 67.71 $\pm$ 7.69  | 60.52 $\pm$ 6.03  | 0.66           |
| $V_m$ , mV       | -65.44 $\pm$ 1.19 | -66.62 $\pm$ 1.50 | -68.18 $\pm$ 1.44 | 0.37           |
| AP threshold, mV | -39.43 $\pm$ 0.87 | -38.54 $\pm$ 1.32 | -39.57 $\pm$ 0.96 | 0.77           |
| AP height, mV    | 66.75 $\pm$ 2.71  | 65.32 $\pm$ 2.60  | 69.57 $\pm$ 2.35  | 0.54           |

Values are mean  $\pm$  SEM. Membrane constant,  $\tau_m$ ; resting membrane potential,  $V_m$ ; action potential, AP. Intrinsic and action potential properties did not differ among GFP-, GFP+/tdT- and GFP+/tdT+ layers 2/3 pyramidal neurons in electroporated somatosensory cortex. *p* value, one-way ANOVA.
