# Supplementary material
Source: PubMed Central journal article supplement (PMC4096992)

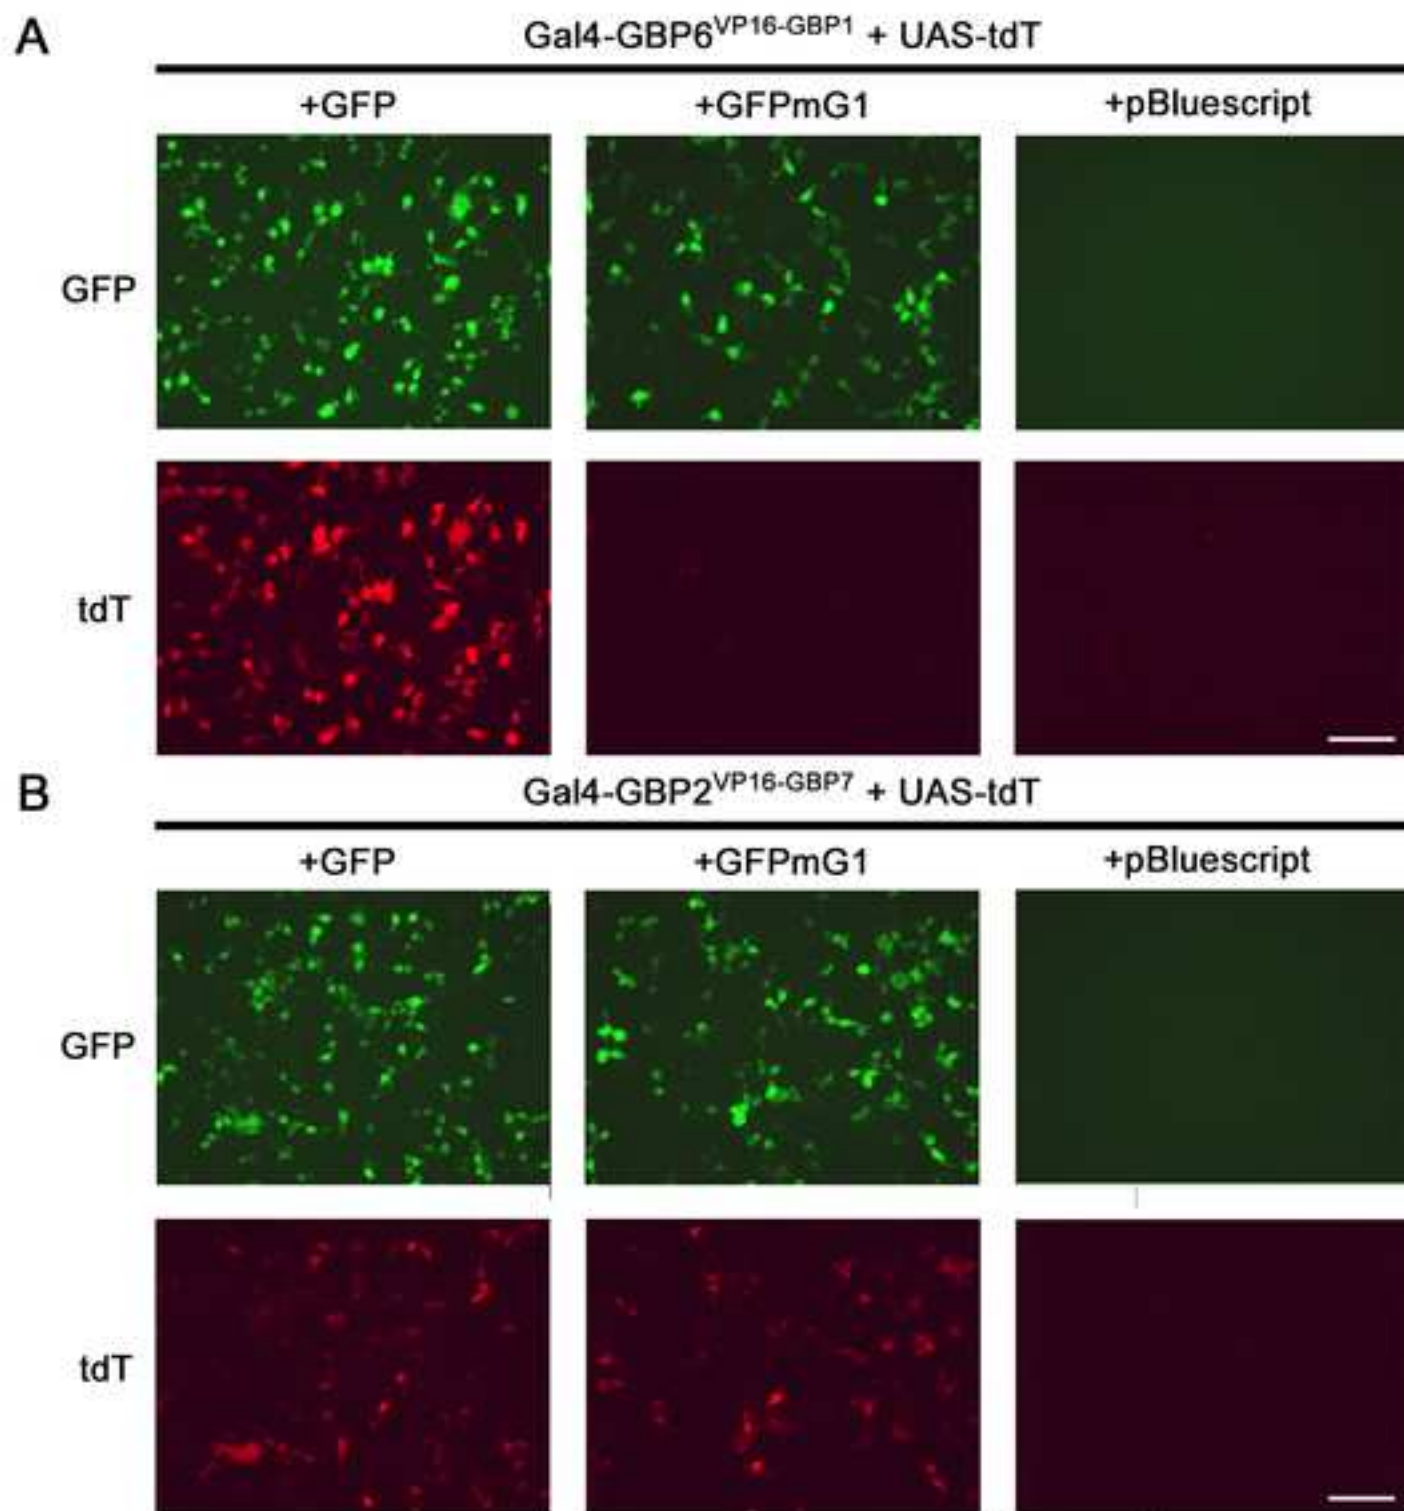

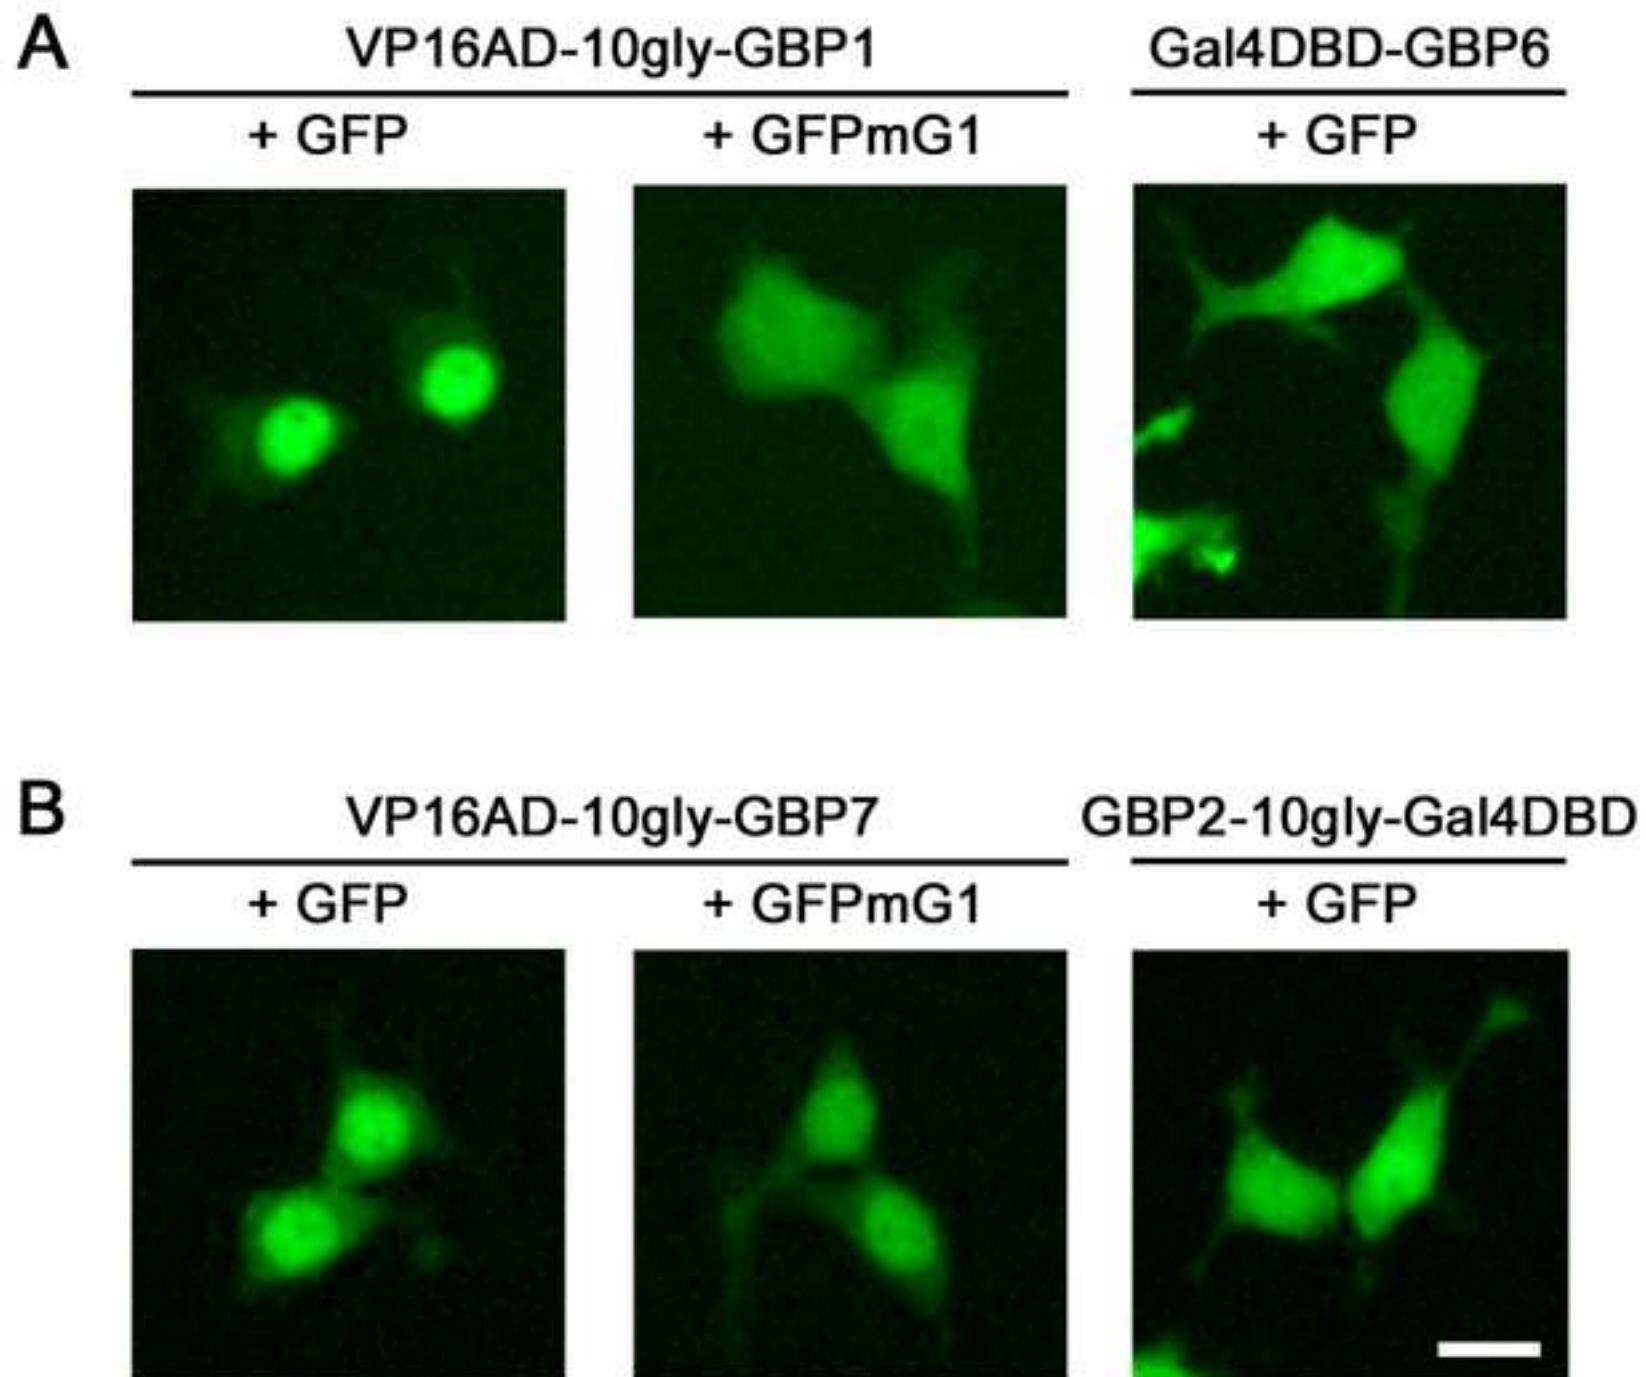

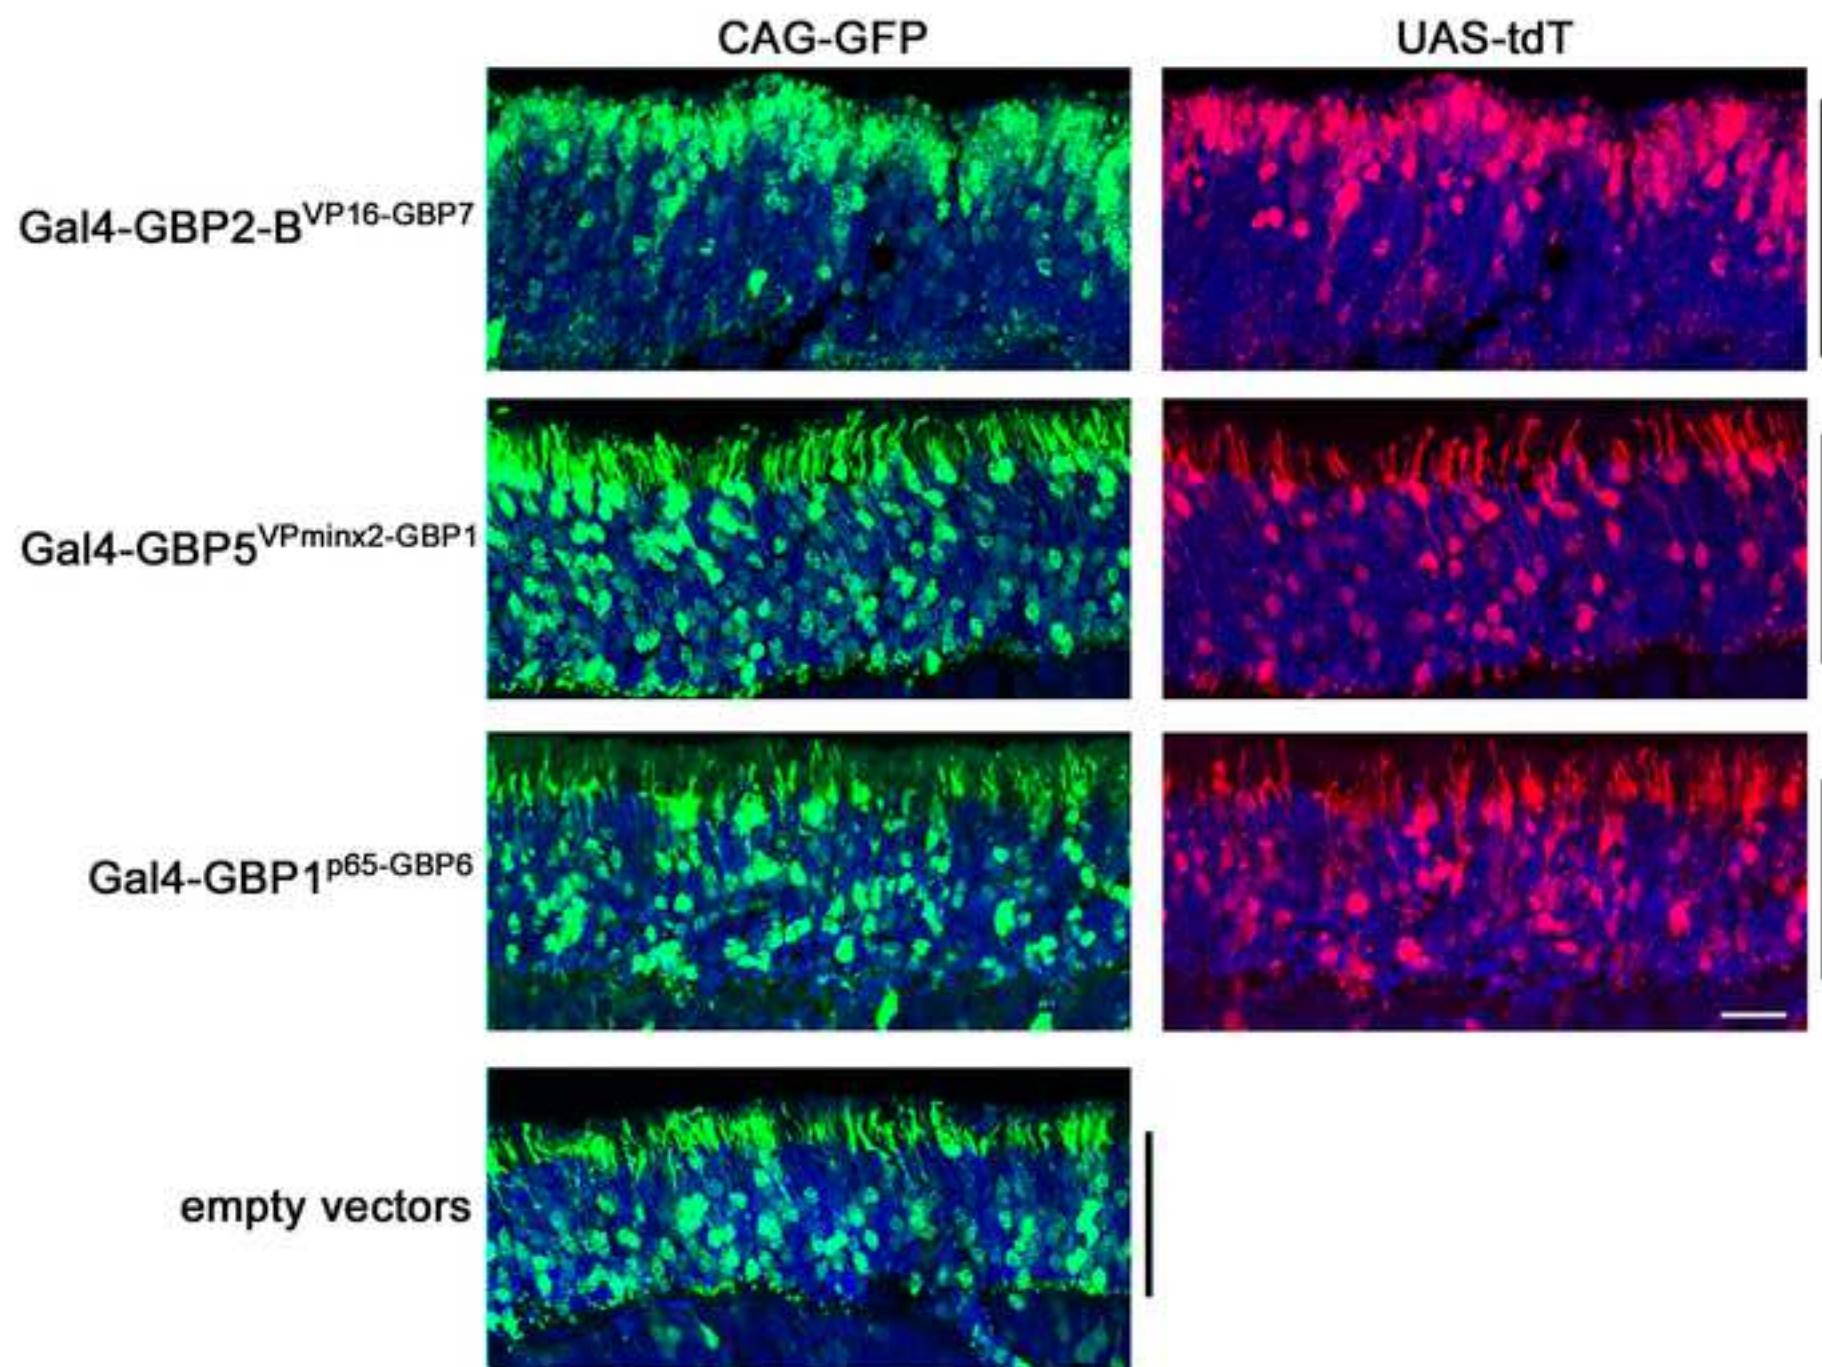

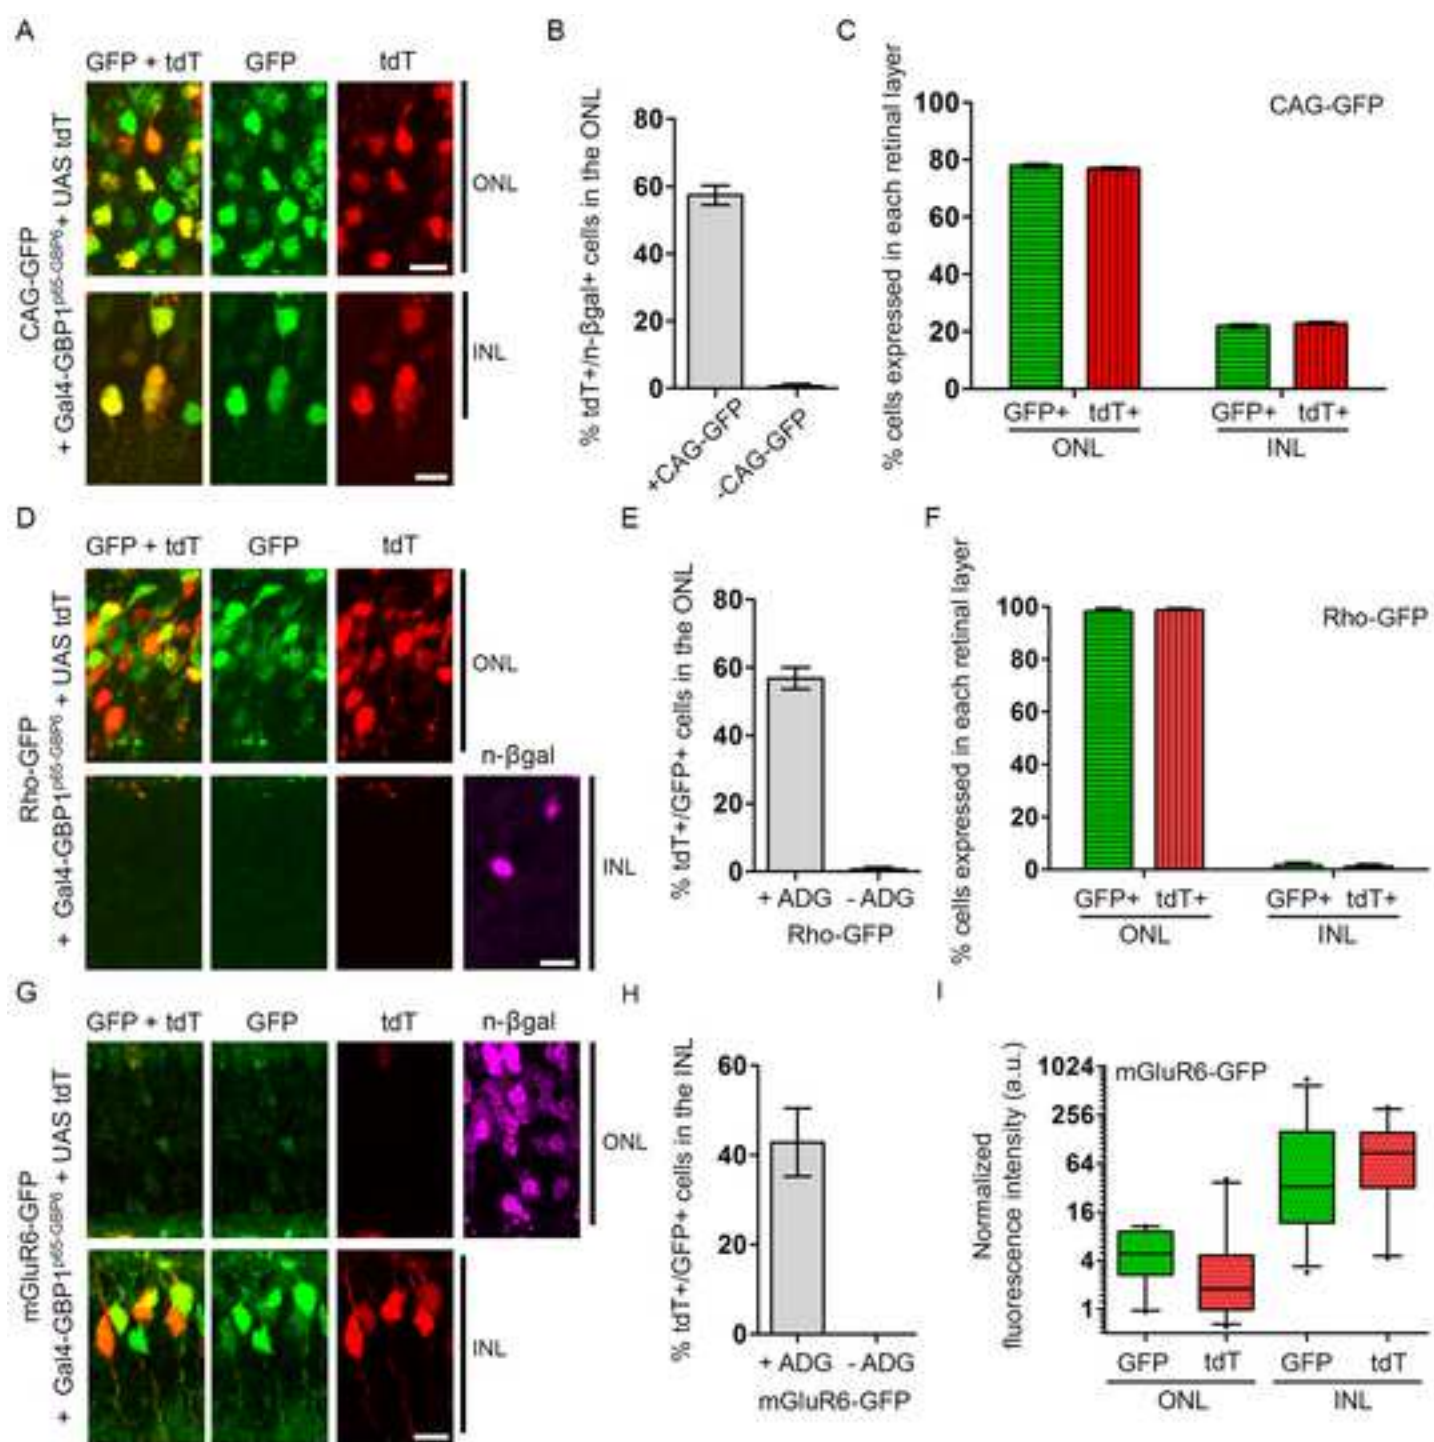

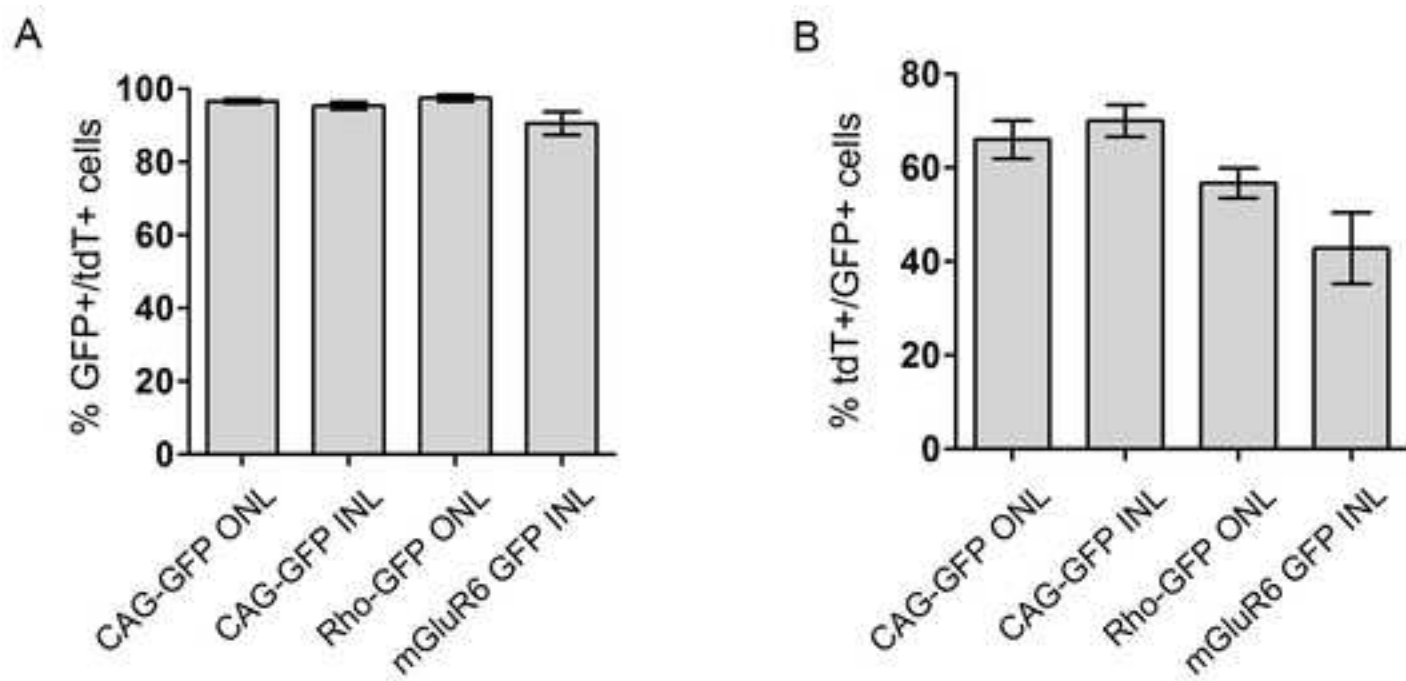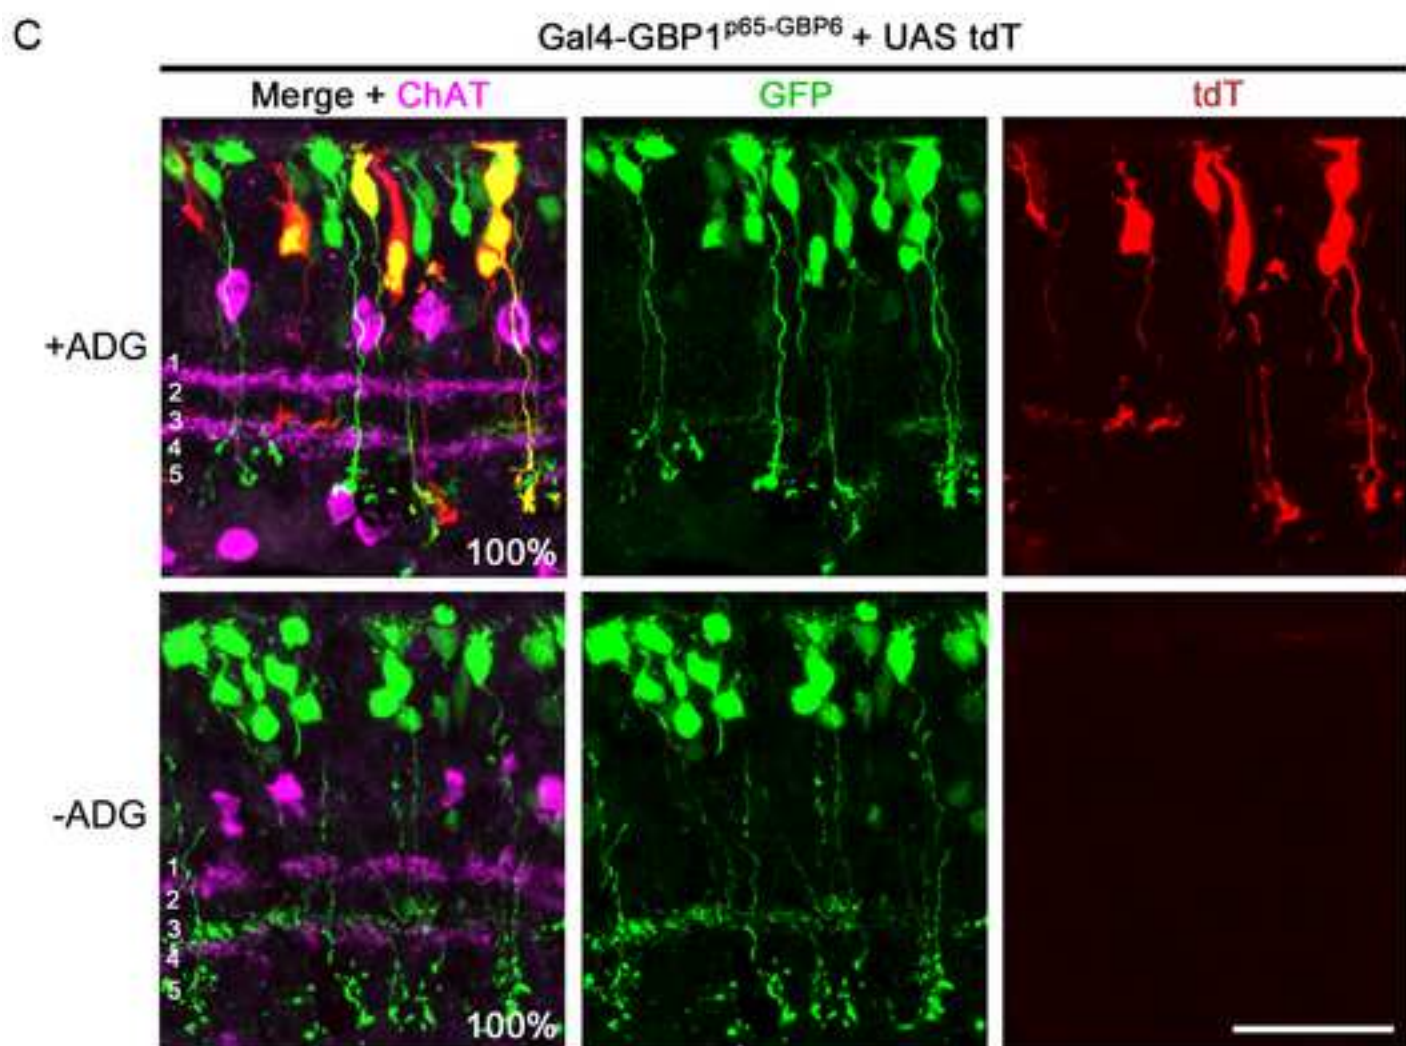

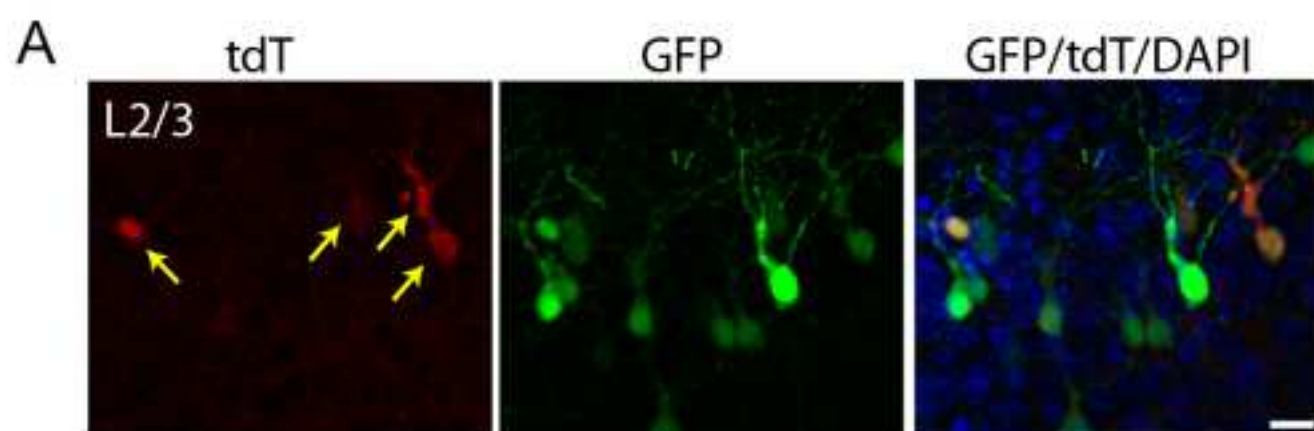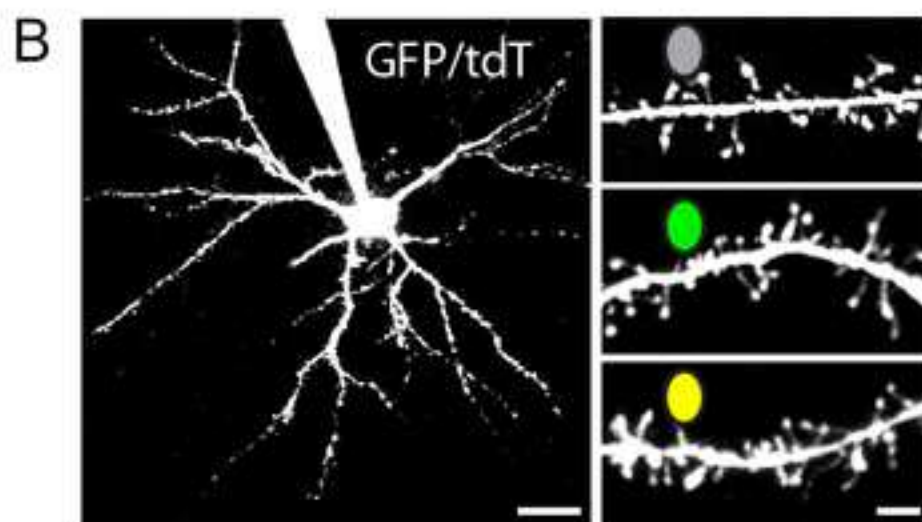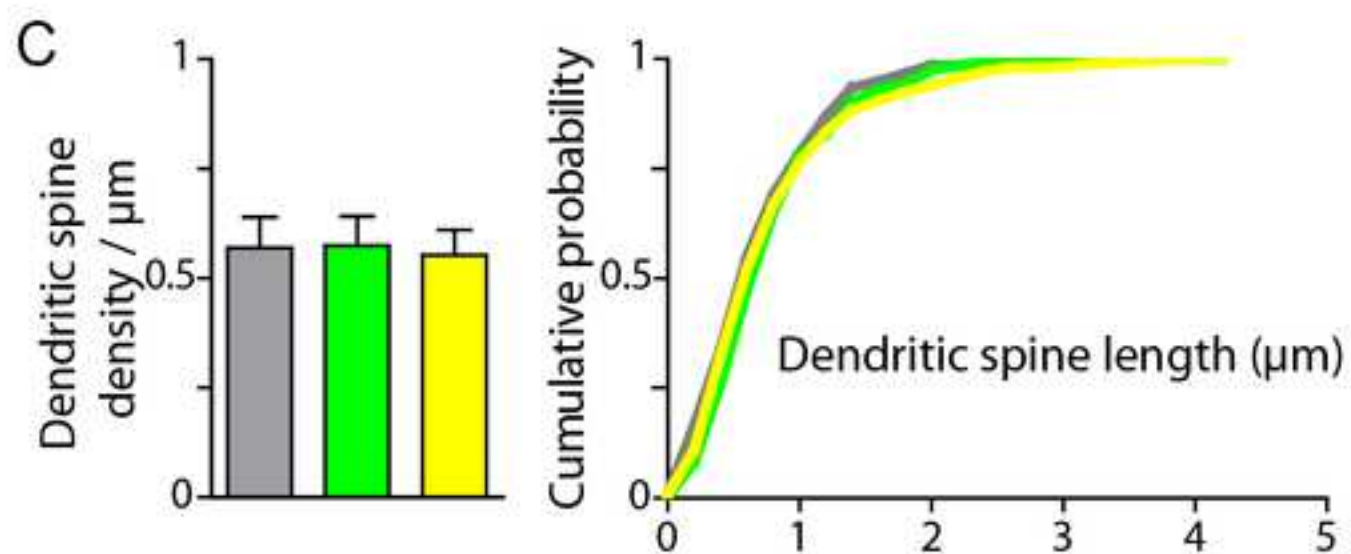

A

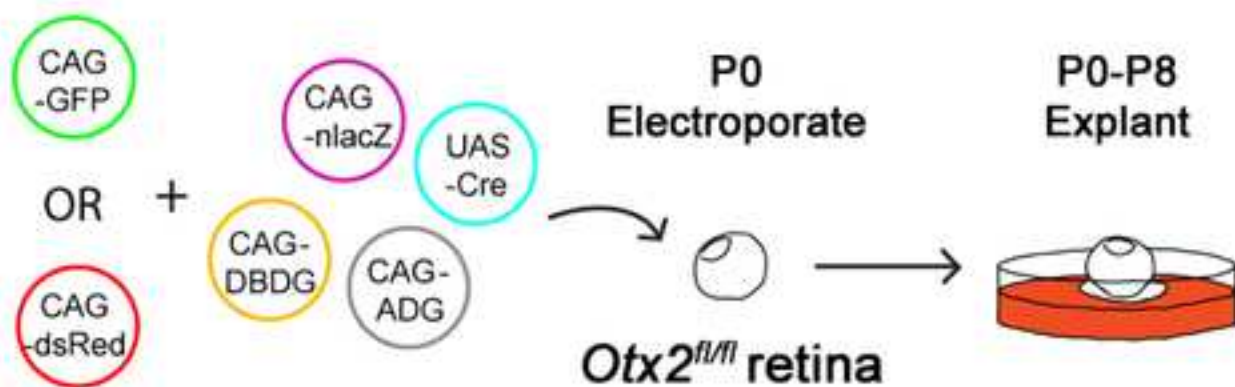

B

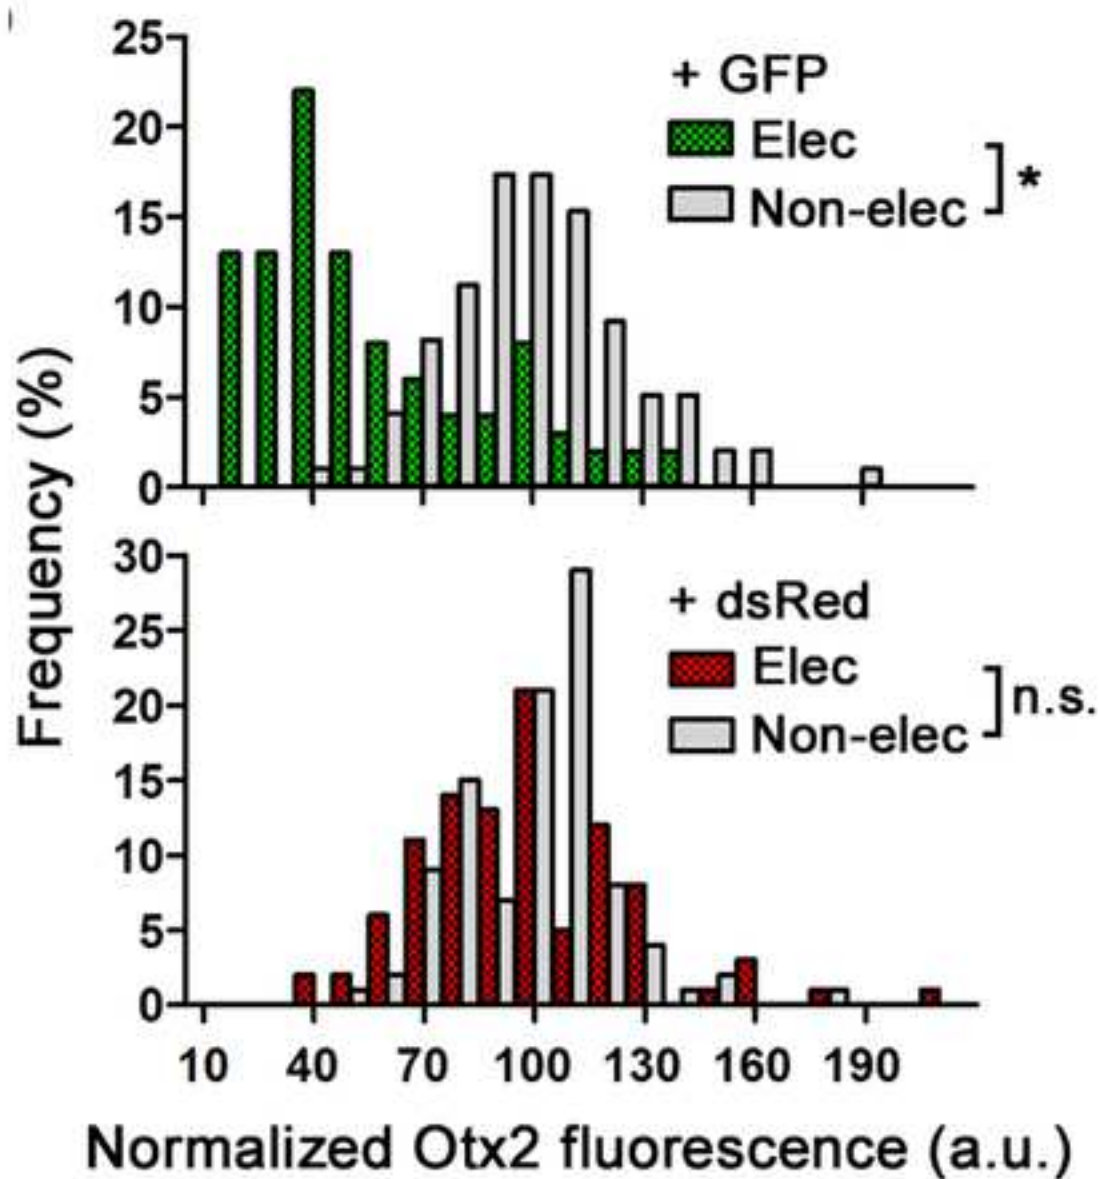

Supplement: NIHMS600460-supplement-02.pdf [file NIHMS600460-supplement-02.pdf]
